# Supplementary material
Source: PubMed Central journal article supplement (PMC4175976)
Supplement: Supp_Fig1.pdf [file Supp_Fig1.pdf]

## Supplementary Data

[illegible]

**SUPPLEMENTARY FIG. S1.** Alignments of the ARMS-PCR primers to the TFDP1 indel84 region.
