# Supplementary material
Source: PubMed Central journal article supplement (PMC4175976)
Supplement: Supp_Fig2.pdf [file Supp_Fig2.pdf]

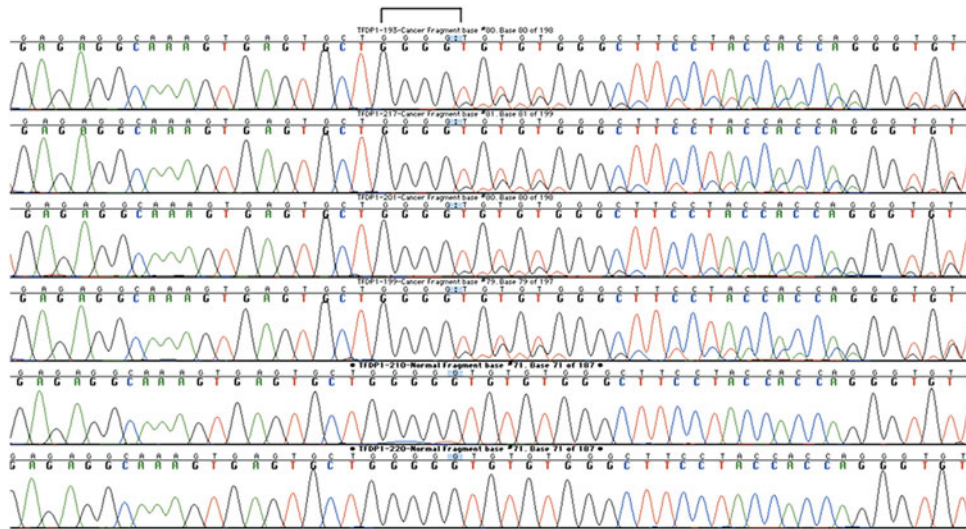

**SUPPLEMENTARY FIG. S2.** Chromatographs demonstrating direct PCR sequencing data. The top four panels present heterozygous alleles, and the lower two panels present homozygous wild-type alleles. Please note that the indel84 allele represented approximately 20%–30% of the alleles in the top four panels.
