# Supplementary material
Source: PubMed Central journal article supplement (PMC4175976)
Supplement: Supp_Fig3.pdf [file Supp_Fig3.pdf]

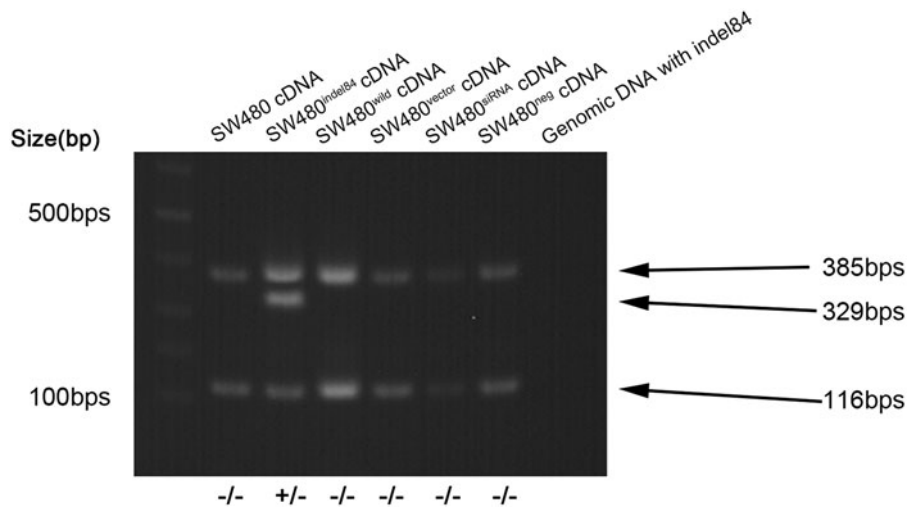

**SUPPLEMENTARY FIG. S3.** Testing of the specificity of the ARMS-PCR in identifying the indel using SW480 cells and SW480 cells with the indel or wild-type construct. The indel construct exhibits an additional PCR band of 329 bp resulting from PCR amplification of the outer primer with the inner R primer, whereas the wild-type cells exhibit an additional band of 116 bp resulting from the outer primer with the inner F primer in addition to the PCR product of 385 bp from the outer primers.
